# Supplementary material for: Measurement report: Evaluation of the TOF-ACSM-CV for PM 1.0 and PM 2.5 measurements during the RITA-2021 field campaign
Source: Copernicus journal article supplement (doi:10.5194/acp-24-3405-2024), 2024-03-19
Supplement: Supplementary file 1 [file acp-24-3405-2024-supplement.pdf]

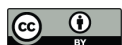

*Supplement of*

**Measurement report: Evaluation of the TOF-ACSM-CV for PM<sub>1.0</sub> and PM<sub>2.5</sub> measurements during the RITA-2021 field campaign**

**Xinya Liu et al.**

*Correspondence to:* Ulrike Dusek (u.dusek@rug.nl)

The copyright of individual parts of the supplement might differ from the article licence.

**Table S1: Comparison analysis of the online (ACSM) and offline (Filters) mass concentrations of various chemical components for PM<sub>1.0</sub> during May 2021.**

| <b>Online PM<sub>1.0</sub> VS Offline PM<sub>1.0</sub> in May 2021</b> |                       |                       |                       |               |              |
|------------------------------------------------------------------------|-----------------------|-----------------------|-----------------------|---------------|--------------|
| <b>Species</b>                                                         | <b>NO<sub>3</sub></b> | <b>SO<sub>4</sub></b> | <b>NH<sub>4</sub></b> | <b>Org/OC</b> | <b>Total</b> |
| <b>Slope</b>                                                           | 0.939                 | 0.901                 | 1.092                 | 2.774         | 1.244        |
| <b>Slope_std</b>                                                       | 0.089                 | 0.159                 | 0.104                 | 0.918         | 0.136        |
| <b>R<sup>2</sup></b>                                                   | 0.978                 | 0.927                 | 0.978                 | 0.801         | 0.971        |
| <b>Intercept</b>                                                       | -0.186                | -0.316                | 0.089                 | -0.929        | -1.146       |
| <b>T-statistic</b>                                                     | 6.390                 | 24.294                | -7.838                | -3.851        | -0.261       |
| <b>P-value</b>                                                         | 2.38E-05              | 3.22E-12              | 2.80E-06              | 2.31E-03      | 7.98E-01     |

5 **Table S2: Comparison analysis of the online (ACSM and MAAP) and offline (Filters) mass concentrations of various chemical components for PM<sub>2.5</sub> during May 2021.**

| <b>ACSM +MAAP PM<sub>2.5</sub> VS Filter PM<sub>2.5</sub> in May 2021</b> |                       |                       |                       |               |               |              |
|---------------------------------------------------------------------------|-----------------------|-----------------------|-----------------------|---------------|---------------|--------------|
| <b>Species</b>                                                            | <b>NO<sub>3</sub></b> | <b>SO<sub>4</sub></b> | <b>NH<sub>4</sub></b> | <b>Org/OC</b> | <b>eBC/EC</b> | <b>Total</b> |
| <b>Slope</b>                                                              | 0.884                 | 0.989                 | 0.958                 | 2.111         | 1.550         | 1.135        |
| <b>Slope_std</b>                                                          | 0.100                 | 0.241                 | 0.149                 | 1.272         | 0.441         | 0.172        |
| <b>R<sup>2</sup></b>                                                      | 0.968                 | 0.870                 | 0.942                 | 0.548         | 0.830         | 0.945        |
| <b>Intercept</b>                                                          | -0.394                | -0.477                | 0.161                 | -0.103        | 0.013         | -1.126       |
| <b>T-statistic</b>                                                        | 9.137                 | 15.513                | -3.754                | -4.941        | -6.949        | 1.376        |
| <b>P-value</b>                                                            | 5.08E-07              | 9.11E-10              | 2.41E-03              | 3.42E-04      | 1.01E-05      | 1.92E-01     |

**Table S3: Comparison analysis of the online (ACSM and MAAP) and offline (Filters) mass concentrations of various chemical components for PM<sub>2.5</sub> during September 2021.**

| <b>ACSM +MAAP PM<sub>2.5</sub> VS Filter PM<sub>2.5</sub> in Sep 2021</b> |                       |                       |                       |               |               |              |
|---------------------------------------------------------------------------|-----------------------|-----------------------|-----------------------|---------------|---------------|--------------|
| <b>Species</b>                                                            | <b>NO<sub>3</sub></b> | <b>SO<sub>4</sub></b> | <b>NH<sub>4</sub></b> | <b>Org/OC</b> | <b>eBC/EC</b> | <b>Total</b> |
| <b>Slope</b>                                                              | 0.931                 | 0.856                 | 1.163                 | 1.994         | 1.577         | 1.352        |
| <b>Slope_std</b>                                                          | 0.242                 | 0.259                 | 0.229                 | 0.324         | 0.150         | 0.266        |
| <b>R<sup>2</sup></b>                                                      | 0.748                 | 0.687                 | 0.838                 | 0.612         | 0.821         | 0.508        |
| <b>Intercept</b>                                                          | 0.809                 | 0.260                 | 0.012                 | 1.104         | 0.003         | 4.614        |
| <b>T-statistic</b>                                                        | -3.628                | -0.484                | -1.116                | -6.361        | -5.578        | -6.312       |
| <b>P-value</b>                                                            | 1.10E-02              | 6.46E-01              | 3.07E-01              | 1.17E-06      | 8.42E-06      | 1.11E-06     |

10 **Table S4: Daily molar mass concentrations (Mol m<sup>-3</sup>) from Filter samples in May 2021.**

| <b>Molar mass<br/>(Mol m<sup>-3</sup>)</b><br><b>Date</b> | <b>Cation<br/>PM<sub>1.0</sub></b> | <b>Anion<br/>PM<sub>1.0</sub></b> | <b>Cation<br/>PM<sub>2.5</sub></b> | <b>Anion<br/>PM<sub>2.5</sub></b> |
|-----------------------------------------------------------|------------------------------------|-----------------------------------|------------------------------------|-----------------------------------|
| 2021-5-10                                                 | 0.026                              | 0.042                             | 0.029                              | 0.055                             |
| 2021-5-11                                                 | 0.053                              | 0.070                             | 0.065                              | 0.095                             |
| 2021-5-12                                                 | 0.038                              | 0.059                             | 0.042                              | 0.085                             |
| 2021-5-13                                                 | 0.045                              | 0.066                             | 0.059                              | 0.089                             |
| 2021-5-14                                                 | 0.079                              | 0.100                             | 0.102                              | 0.133                             |
| 2021-5-15                                                 | 0.068                              | 0.087                             | 0.090                              | 0.115                             |
| 2021-5-16                                                 | 0.019                              | 0.038                             | 0.021                              | 0.059                             |
| 2021-5-17                                                 | 0.030                              | 0.045                             | 0.036                              | 0.061                             |
| 2021-5-18                                                 | 0.035                              | 0.054                             | 0.042                              | 0.071                             |
| 2021-5-19                                                 | 0.048                              | 0.067                             | 0.056                              | 0.089                             |
| 2021-5-20                                                 | 0.049                              | 0.068                             | 0.076                              | 0.100                             |
| 2021-5-21                                                 | 0.004                              | 0.020                             | 0.003                              | 0.030                             |
| 2021-5-22                                                 | 0.010                              | 0.025                             | 0.013                              | 0.034                             |
| 2021-5-23                                                 | 0.022                              | 0.037                             | 0.033                              | 0.058                             |
| Slope                                                     | 1.070                              |                                   | 1.005                              |                                   |
| R <sup>2</sup>                                            | 0.992                              |                                   | 0.958                              |                                   |
| Intercept                                                 | 0.015                              |                                   | 0.029                              |                                   |
| T statistic                                               | -27.330                            |                                   | -18.207                            |                                   |
| P value                                                   | 7.170E-13                          |                                   | 1.238E-10                          |                                   |

**Table S5: Daily molar mass concentrations (Mol m<sup>-3</sup>) from ACSM measurements in May 2021.**

| <b>Molar mass<br/>(Mol m<sup>-3</sup>)</b><br><b>Date</b> | <b>Cation<br/>PM<sub>1.0</sub></b> | <b>Anion<br/>PM<sub>1.0</sub></b> | <b>Cation<br/>PM<sub>2.5</sub></b> | <b>Anion<br/>PM<sub>2.5</sub></b> |
|-----------------------------------------------------------|------------------------------------|-----------------------------------|------------------------------------|-----------------------------------|
| 2021-5-10                                                 | 0.031                              | 0.027                             | 0.028                              | 0.027                             |
| 2021-5-11                                                 | 0.064                              | 0.058                             | 0.065                              | 0.064                             |
| 2021-5-12                                                 | 0.043                              | 0.040                             | 0.054                              | 0.058                             |
| 2021-5-13                                                 | 0.062                              | 0.056                             | 0.076                              | 0.076                             |
| 2021-5-14                                                 | 0.093                              | 0.082                             | 0.111                              | 0.105                             |
| 2021-5-15                                                 | 0.073                              | 0.064                             | 0.088                              | 0.084                             |
| 2021-5-16                                                 | 0.026                              | 0.022                             | 0.032                              | 0.032                             |
| 2021-5-17                                                 | 0.040                              | 0.032                             | 0.047                              | 0.043                             |
| 2021-5-18                                                 | 0.046                              | 0.040                             | 0.057                              | 0.054                             |
| 2021-5-19                                                 | 0.056                              | 0.049                             | 0.068                              | 0.064                             |
| 2021-5-20                                                 | 0.058                              | 0.053                             | 0.074                              | 0.070                             |
| 2021-5-21                                                 | 0.007                              | 0.007                             | 0.008                              | 0.010                             |
| 2021-5-22                                                 | 0.018                              | 0.014                             | 0.021                              | 0.019                             |
| 2021-5-23                                                 | 0.025                              | 0.022                             | 0.033                              | 0.032                             |
| Slope                                                     | 0.903                              |                                   | 0.951                              |                                   |
| R <sup>2</sup>                                            | 0.996                              |                                   | 0.994                              |                                   |
| Intercept                                                 | -0.001                             |                                   | 0.001                              |                                   |
| T statistic                                               | 7.716                              |                                   | 2.520                              |                                   |
| P value                                                   | 3.315E-06                          |                                   | 2.559E-02                          |                                   |

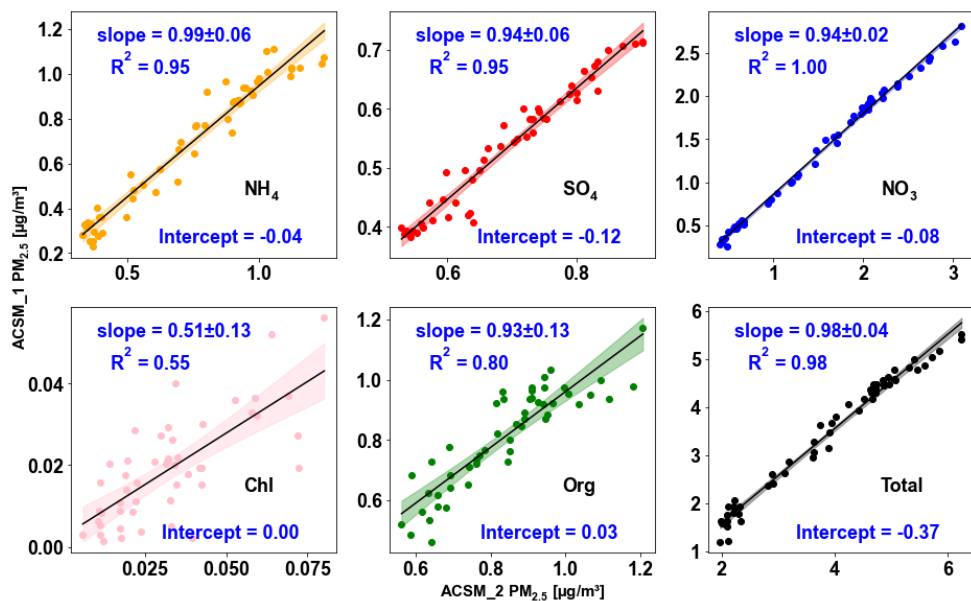

15 Figure S 1 Intercomparison and correlation of two collocated TOF-ACSM with PM<sub>2.5</sub> lens and inlet. The light shades represent the 95% confidence interval.

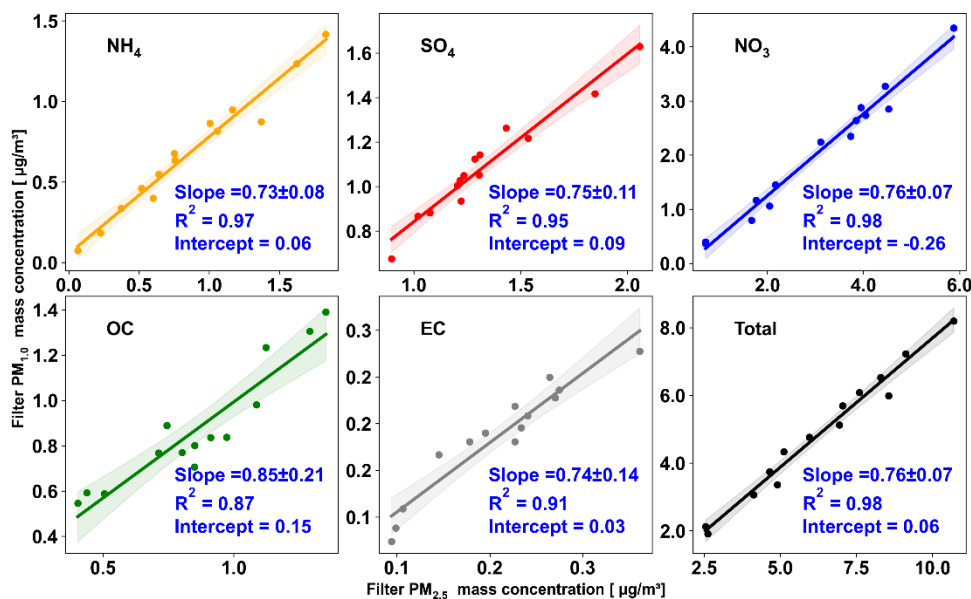

Figure S 2 The correlations between different chemical species analyzed on the PM<sub>1.0</sub> and PM<sub>2.5</sub> measured by filter samples. The light shades represent the 95% confidence interval.

20

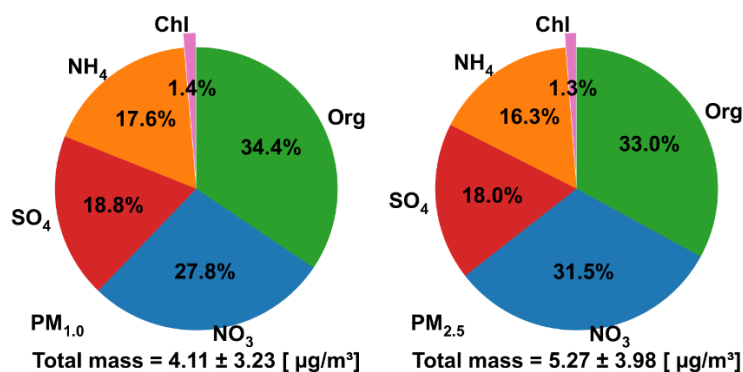

Figure S 3 Fractional contribution of different chemical species to the total mass concentration detected by the ACSM after a  $PM_{1.0}$  and a  $PM_{2.5}$  inlet, respectively.

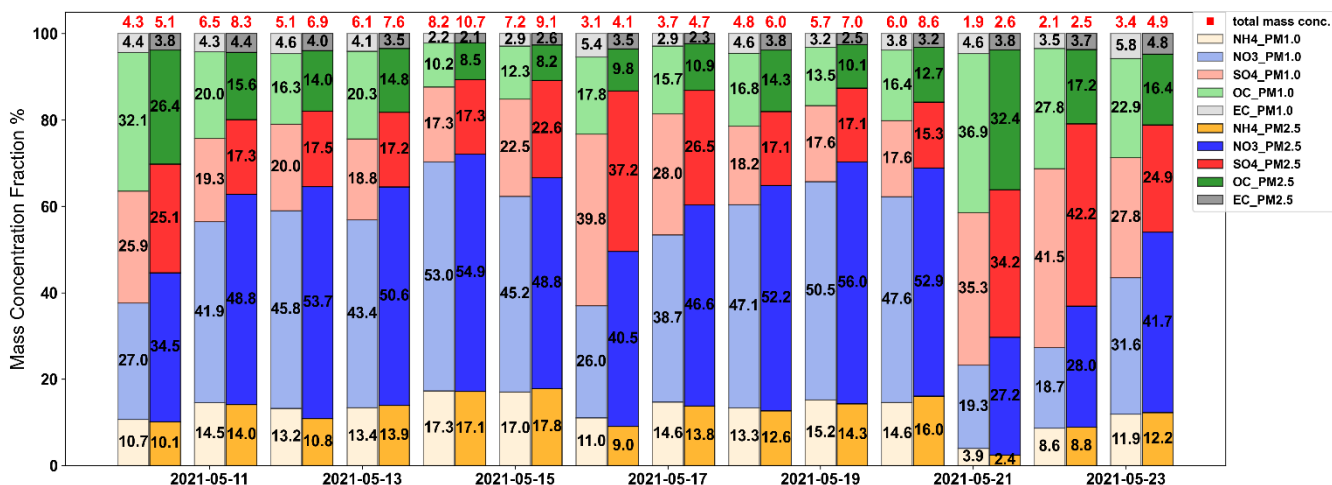

25

Figure S 4 The fractional contribution of different species to the total analyzed mass concentration of daily  $PM_{1.0}$  (left in light colour) and  $PM_{2.5}$  (right in dark colour) filter samples. The total analysed mass concentration is given in red at the top of the bar.

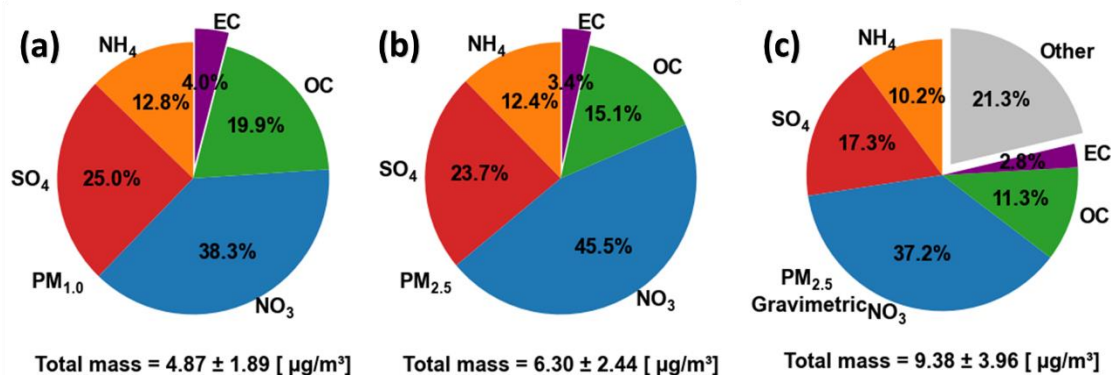

Figure S 5 (a) and (b) the averaged mass fraction of each species in the analyzed mass concentration of  $PM_{1.0}$  and  $PM_{2.5}$  filter samples, and (c) the respective mass fractions of the total  $PM_{2.5}$  gravimetric mass during the campaign.

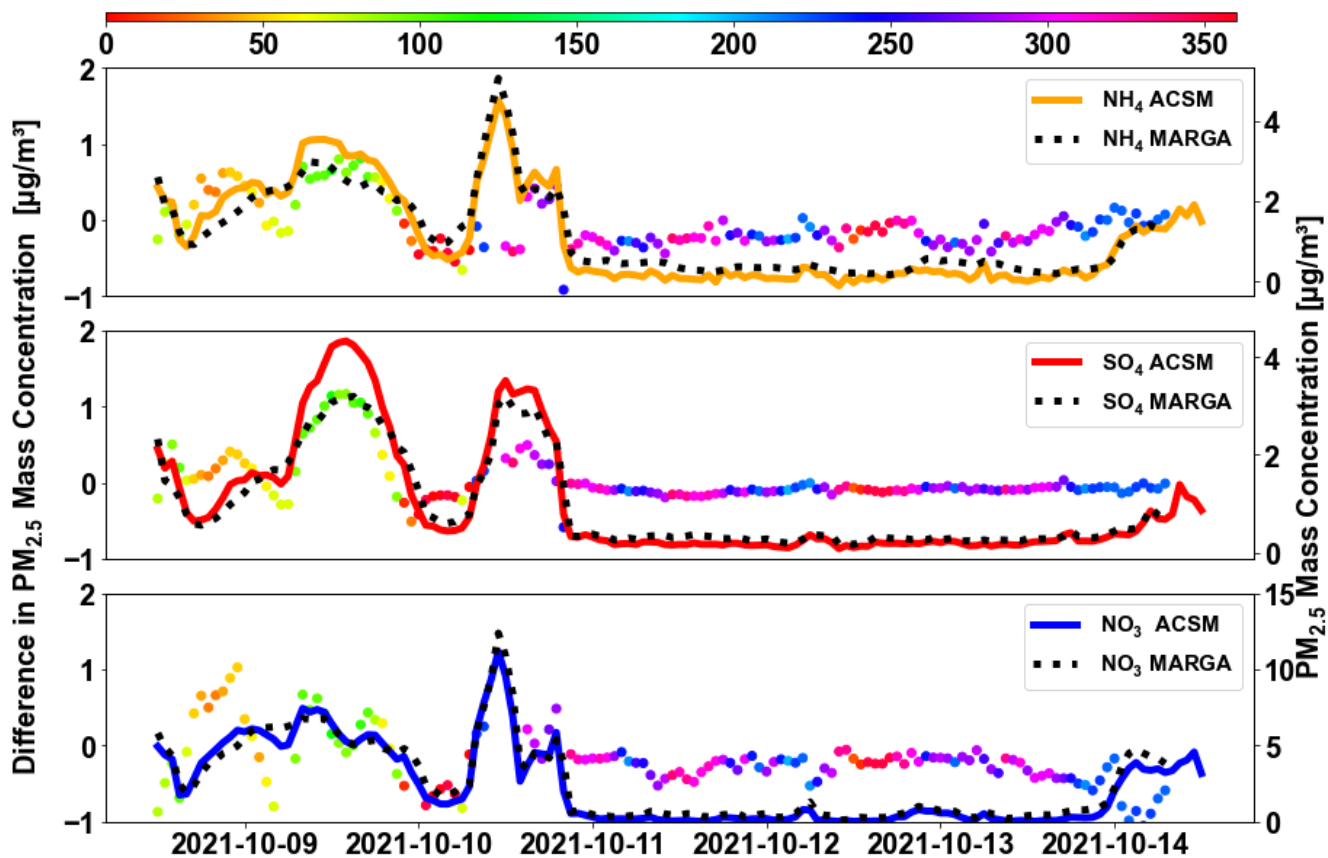

30

Figure S 6 Time series of  $\text{PM}_{2.5}$  mass concentration (in solid line, values show in right y axis) for each species measured by ACSM and MARGA. The differences (in dotted line, values show in left y axis) between the ACSM and MARGA measurements with colors representing different wind directions.

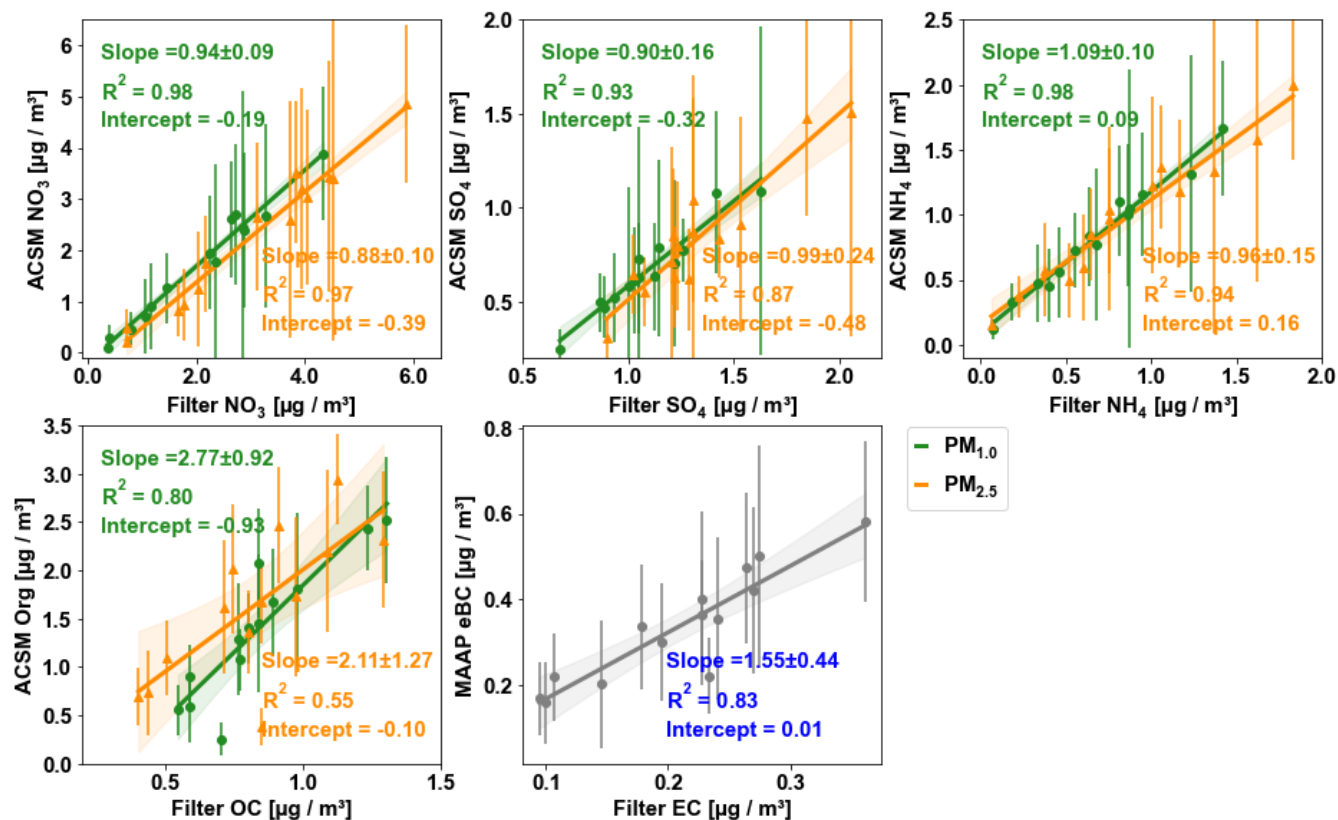

35 Figure S 7 The linear regression fitting correlations between the online (ACSM and MAAP) and offline (Filters) daily average mass concentrations of various chemical components. PM<sub>1.0</sub> is indicated in green and PM<sub>2.5</sub> in orange. The shaded area represents the 95% confidential interval of the best fit line. Error bars on y axis represent the standard deviation of the measurements during the day.
